# Supplementary material for: One-dimensional H2V3O8 nanorods and two-dimensional lamellar MXene composites as efficient cathode materials for aqueous rechargeable zinc ion batteries
Source: Royal Society of Chemistry journal article supplement (doi:10.1039/d3ra05754b), 2023-01-01
Supplement: d3ra05754b1.pdf [file d3ra05754b1.pdf]

## Supporting Information

# One-Dimensional $\text{H}_2\text{V}_3\text{O}_8$ Nanorods and Two-Dimensional Lamellar MXene Composites as Efficient Cathode Materials for Aqueous Rechargeable Zinc-Ion Batteries

*Wenyuan Duan<sup>a</sup>, Shenghua Chen<sup>b</sup>, Yanlin Li<sup>\*b</sup>, Shaoquan Chen<sup>a</sup>, Yuzhen Zhao<sup>\*a</sup>*

<sup>a</sup> Xi'an Key Laboratory of Advanced Photo-electronics Materials and Energy Conversion Device, Xijing University, Xi'an 710123, China.

<sup>b</sup> School of Materials Science and Engineering, Xi'an University of Architecture and Technology, Xi'an 710055, China.

E-mail: liyanlin@xauat.edu.cn; zyz19870226@163.com

**Figure S1**

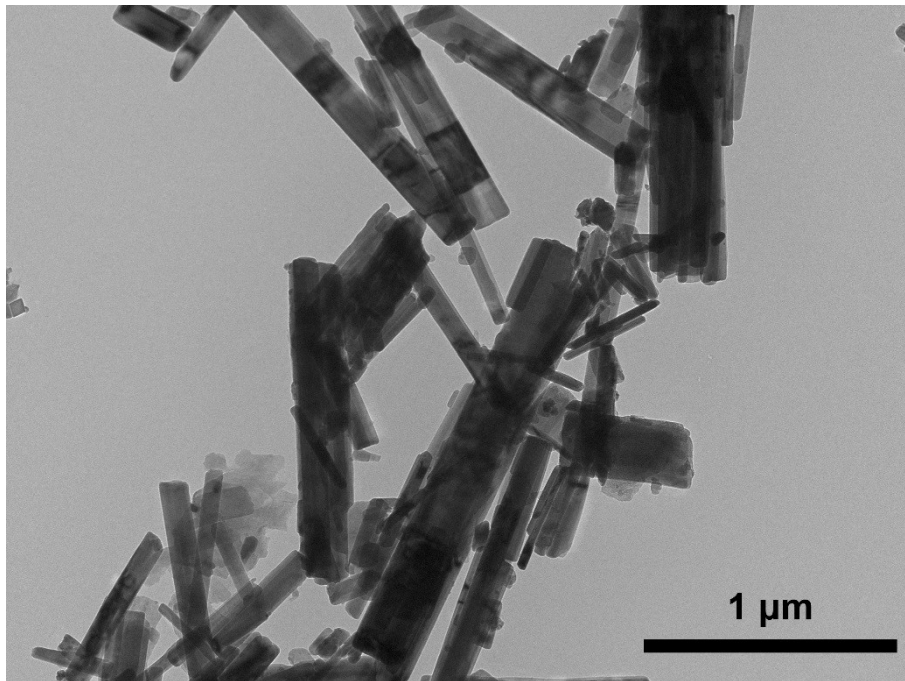

Fig. S1. The TEM image of H<sub>2</sub>V<sub>3</sub>O<sub>8</sub> (36 h) nanorods.

**Figure S2**

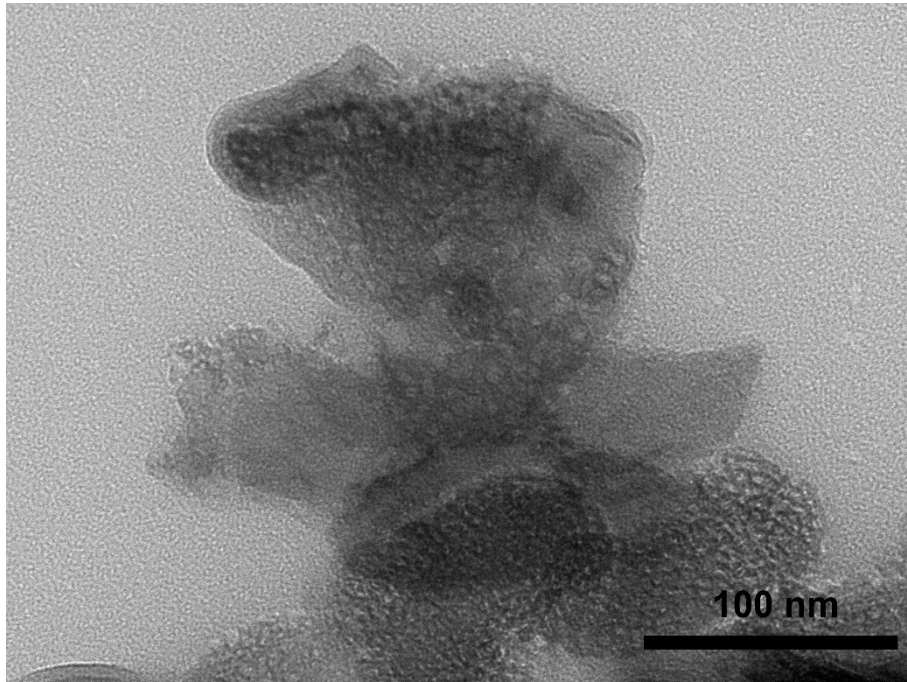

Fig. S2. The TEM image of MXene.

**Figure S3**

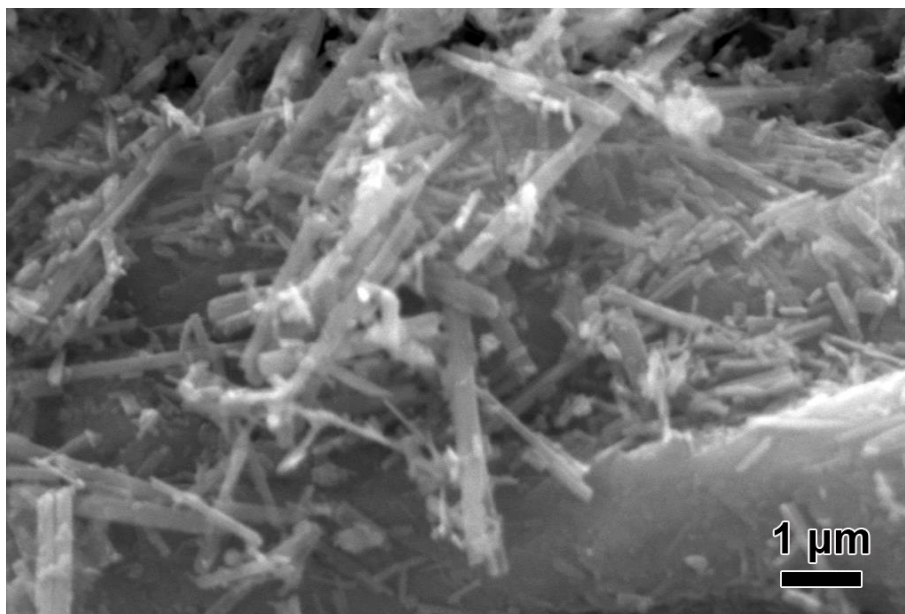

Fig. S3. The SEM image of  $\text{H}_2\text{V}_3\text{O}_8/\text{MXene}$ .

**Figure S3**

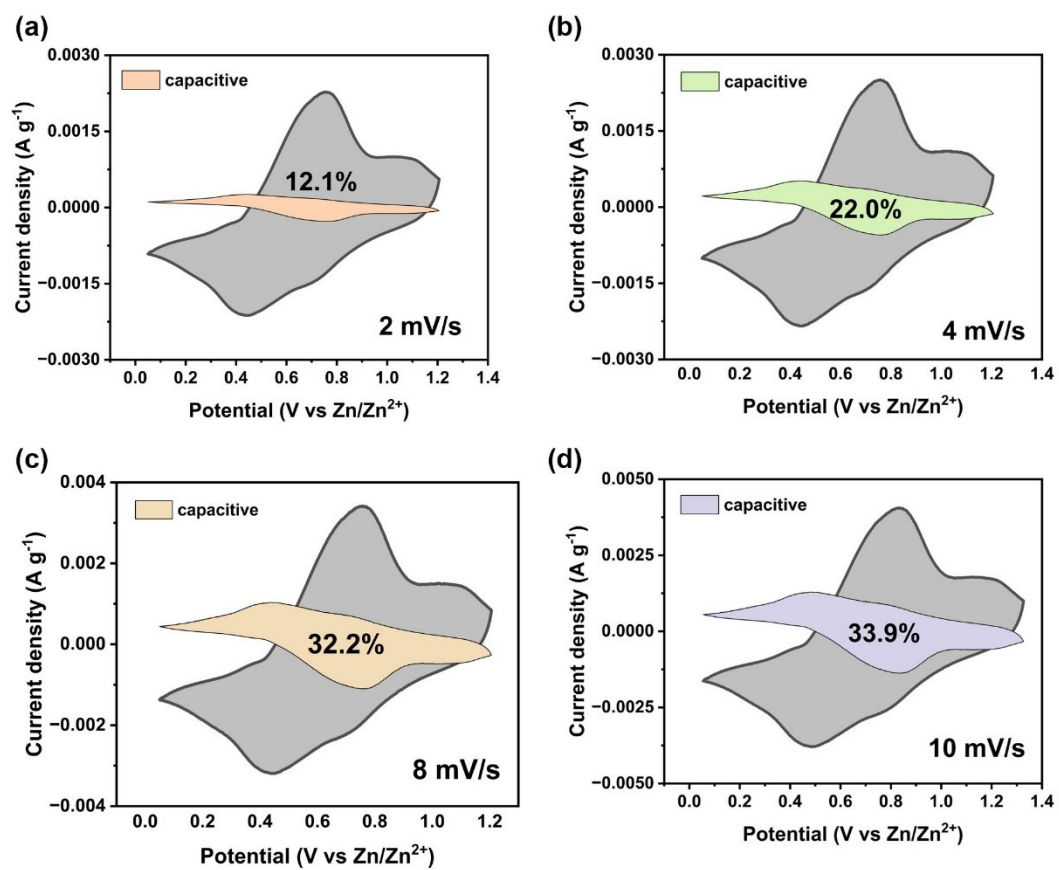

Fig. S4. The capacitive and diffusion-controlled contribution  $\text{H}_2\text{V}_3\text{O}_8/\text{MXene}$  composites

ARZBs at 2, 4, 8, 10 mV/s.
